# Supplementary material
Source: PubMed Central journal article supplement (PMC6637411)
Supplement: NIHMS1529813-supplement-3.pdf [file NIHMS1529813-supplement-3.pdf]

**Figure S1**

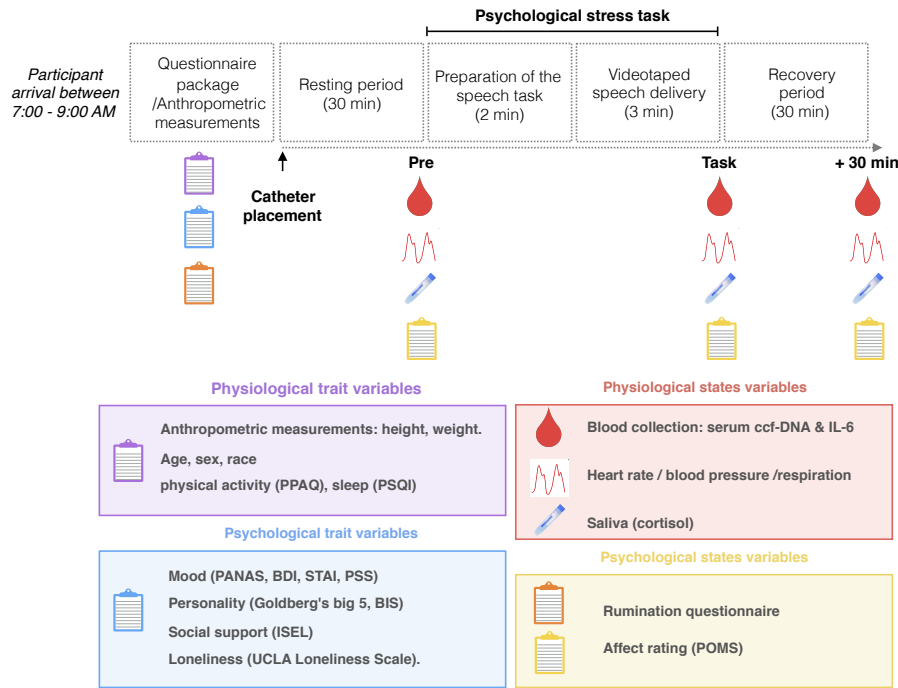

**Figure S1. Detailed study timeline.** Abbreviations: BDI, Beck depression inventory; BIS, Behavioral Inhibition Scale; HRV, Heart Rate Variability; ISEL, Interpersonal Support Evaluation List; PANAS, Positive and Negative Affect Schedule; POMS, Profile of Mood States; PPAQ, Paffenbarger Physical Activity Questionnaire; PSQI, Pittsburgh Sleep Quality Index ; STAI, State-Trait Anxiety Index. State/trait and physiological/psychological variable categories are color-coded with those in Figure 2 in the main text.

Figure S2

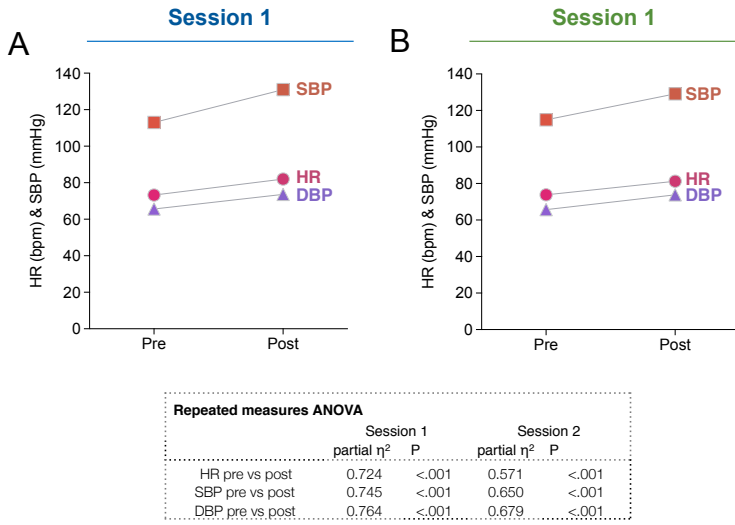

**Figure S2. Physiological responses to induced psychological stress (A)** Stress-induced elevation of SBP, DBP and HR at session 1 and **(B)** at session 2, confirming the successful experimental manipulation of physiological stress response. Repeated measures ANOVA,  $n = 49$  per session. *Abbreviations:* DBP: diastolic blood pressure, SBP: systolic blood pressure, HR: Heart rate.
